# Supplementary material
Source: Research Square preprint supplement (doi:10.21203/rs.3.rs-9285821/v1)
Supplement: Supplementary file 1 [file 259a62d9d06677fadad8cc62.docx]

**Figure S1:** 1H NMR spectrum

**Figure S2:** 13C NMR spectrum

**Table S1: Spectral analysis of isolated capsaicinoid:**

| **Major Capsaicinoid** | **1H NMR signals** | **13C NMR signals** |
| --- | --- | --- |
| **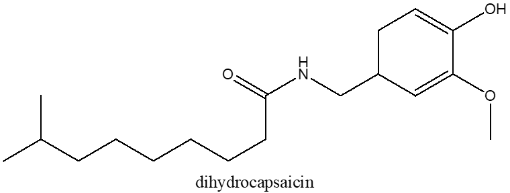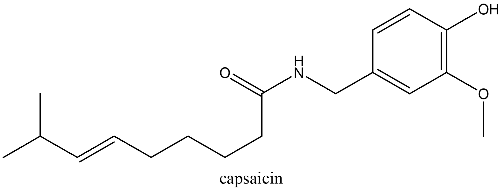** | 6.79 (1H, d,1.8), 6.85 (1H, d,1.8), 6.74 (1H), 4.3 (2H,d), 2.2(m,2H), 1.64(2H, tt), 1.37(2H, tt), 1.98 (2H,m), 2.20 (1H, m), 0.95 (6H,d), 3.85 (3H,s), 5.80 (1H,s), 5.33(2H,m), 6.81(1H, d), 6.86 (1H,d), 6.76 (1H, dd), 4.35(2H, d), 2.19(2H, t), 1.65(2H, m), 1.32-1.26(6H, m), 1.15(2H,m), 1.50(1H, m), 0.85(6H,d), 3.88(3H, s). | 173.06 **(**NH**-CO),** 110.7 **(C=C),** 146.74 **(**OH**-C),** 138.1**(**OCH3**-C),** 114.39 **(**CH2**-C),** 120.74 **(**C**-C-**C)**,** 130.31 **(**C**-C-**C**),** 126.47 **(**C**-C-**C**),** 77.04 **(**O**C**H3**),** 55.94 **(**Benz**-C-**NH**),** 22.64 **(C-**CH3**),** 25.29 **(C-**CH3**),** 27.24 **(**C**-C-**C**),** 29.28 **(**C**-C),** 30.97 **(**C**-C-**C**),** 32.22 **(**C**-C-**C)**,** 36.66 **(**C**-C-**C**),** 38.95 **(**C**-C-**C**),** 43.56**(**OC**-C).** |
